# Supplementary material for: Extrachromosomal DNA formation enables tumor immune escape potentially through regulating antigen presentation gene expression
Source: PubMed Central journal article supplement (PMC8897507; doi:10.1038/s41598-022-07530-8), 2022-03-04
Supplement: 41598_2022_7530_MOESM1_ESM.pdf [file 41598_2022_7530_MOESM1_ESM.pdf]

## Extrachromosomal DNA formation enables tumor immune escape potentially through regulating antigen presentation gene expression

Tao Wu, Chenxu Wu, Xiangyu Zhao, Guangshuai Wang, Wei Ning, Ziyu Tao, Fuxiang Chen, Xue-Song Liu

### Supplementary Table 1: List of datasets and software used in this study

| data/software                               | resource                                                                                                                                                                                                                                                                                                                                                                                                                    |
|---------------------------------------------|-----------------------------------------------------------------------------------------------------------------------------------------------------------------------------------------------------------------------------------------------------------------------------------------------------------------------------------------------------------------------------------------------------------------------------|
| TCGA somatic mutation                       | <a href="https://gdc-hub.s3.us-east-1.amazonaws.com/download/GDC-PANCAN.mutect2_snv.tsv.gz">https://gdc-hub.s3.us-east-1.amazonaws.com/download/GDC-PANCAN.mutect2_snv.tsv.gz</a>                                                                                                                                                                                                                                           |
| TCGA mRNA expression                        | <a href="https://toil-xena-hub.s3.us-east-1.amazonaws.com/download/tcga_RSEM_gene_tpm.gz">https://toil-xena-hub.s3.us-east-1.amazonaws.com/download/tcga_RSEM_gene_tpm.gz</a>                                                                                                                                                                                                                                               |
| TCGA ecDNA information                      | Kim H, Nguyen N P, Turner K, et al. Extrachromosomal DNA is associated with oncogene amplification and poor outcome across multiple cancers[J]. Nature genetics, 2020, 52(9): 891-897.                                                                                                                                                                                                                                      |
| ESTIMATE                                    | R estimate package:<br><a href="https://bioinformatics.mdanderson.org/estimate/rpackage.html">https://bioinformatics.mdanderson.org/estimate/rpackage.html</a>                                                                                                                                                                                                                                                              |
| Immune cell infiltration estimation         | TIMER webserver: <a href="http://timer.comp-genomics.org/">http://timer.comp-genomics.org/</a> , including the results calculated by TIMER, CIBERSORT, quanTIseq, xCell, and MCP-counter algorithms                                                                                                                                                                                                                         |
| Leukocyte fraction                          | Thorsson V, Gibbs D L, Brown S D, et al. The immune landscape of cancer[J]. Immunity, 2018, 48(4): 812-830. e14. ( <a href="https://gdc.cancer.gov/about-data/publications/panimmune">https://gdc.cancer.gov/about-data/publications/panimmune</a> )                                                                                                                                                                        |
| Immunophenoscore (IPS)                      | Charoentong P, Finotello F, Angelova M, et al. Pan-cancer immunogenomic analyses reveal genotype-immunophenotype relationships and predictors of response to checkpoint blockade[J]. Cell reports, 2017, 18(1): 248-262.                                                                                                                                                                                                    |
| Tumor inflammation signature (TIS)          | Danaher P, Warren S, Lu R, et al. Pan-cancer adaptive immune resistance as defined by the Tumor Inflammation Signature (TIS): results from The Cancer Genome Atlas (TCGA)[J]. Journal for immunotherapy of cancer, 2018, 6(1): 1-17. Use GSVA to calculate TIS.                                                                                                                                                             |
| Cytolytic activity score (CYT)              | Geometric mean of expression of GZMA and PRF1 genes                                                                                                                                                                                                                                                                                                                                                                         |
| TCGA samples immune subtype                 | 1.Thorsson V, Gibbs D L, Brown S D, et al. The immune landscape of cancer[J]. Immunity, 2018, 48(4): 812-830. e14. ( <a href="https://gdc.cancer.gov/about-data/publications/panimmune">https://gdc.cancer.gov/about-data/publications/panimmune</a> )<br>2.Bagaev A, Kotlov N, Nomie K, et al. Conserved pan-cancer microenvironment subtypes predict response to immunotherapy[J]. Cancer Cell, 2021, 39(6): 845-865. e7. |
| maf2vcf                                     | <a href="https://github.com/mskcc/vcf2maf/blob/main/maf2vcf.pl">https://github.com/mskcc/vcf2maf/blob/main/maf2vcf.pl</a>                                                                                                                                                                                                                                                                                                   |
| neoantigen prediction software: NeoPredPipe | <a href="https://github.com/MathOnco/NeoPredPipe">https://github.com/MathOnco/NeoPredPipe</a>                                                                                                                                                                                                                                                                                                                               |

**Supplementary Table 2: List of genes in gene sets used for GSVA**

| pathways        | genes for GSVA analysis                                                                                                                                                                                                                                                                                                                                                                                                                                                                                                                                                                                                                                                                                                                                                                                                                                                                                                                                                                                                                                                                                                                                                                                                                                                                                                                                                                                                                                                                                                                                                                                                                                                                                                                                                                                                                                                                                                                                                                                                                                                                                                                                                                                                                                                                                                                                                                                                                                                                                                                                                                                                                                                                                                                                                                                                                                                                                                                                                                                                                                                                                                                                                                                                                                                                                                                                                                                                                                                                                                                                                                                                                                                                                                                                                                                                                                                                                                                                                                                                                                                                                                                                                                                                                                                                                                                                                                                                                                                                                                                                                                                                                                                                                                                                                                                                                                                                                                                                                                                                                                                                                                                                                                                                                                                                                                                                                                                                                                                                                                                                                                                                                                                                                                                                                                                                                                                                                                                                                                                                                                                                                                                                                                                                                                                                                                                                                                                                                                                                                                                                                                                                                                                                                                                                                                                                                                                                                                                                                                                                                                                                                                                                                                                                                                                                                                                                                                                                                                                                                                                                                                                                                                                                                                                                                                                                                                                                                                                                                                                                                                                                                                                                                                                                                                                                                                                                                                                                                                                                                                                                                                                                                                                                                                                                                                                                                                                                                                                                                                                                                                                                                                                                                                                                                                                                                                                                                                                                                                                                                                                                                                                                                                                                                                                                                                                                                                                                                                                                                                                                                                                                                                                                                                                                                                                                                                                                                                                                                                                                                                                                                                                                                                                                                                                                                                                                                                                                                                                                                                                                                                                    |
|-----------------|----------------------------------------------------------------------------------------------------------------------------------------------------------------------------------------------------------------------------------------------------------------------------------------------------------------------------------------------------------------------------------------------------------------------------------------------------------------------------------------------------------------------------------------------------------------------------------------------------------------------------------------------------------------------------------------------------------------------------------------------------------------------------------------------------------------------------------------------------------------------------------------------------------------------------------------------------------------------------------------------------------------------------------------------------------------------------------------------------------------------------------------------------------------------------------------------------------------------------------------------------------------------------------------------------------------------------------------------------------------------------------------------------------------------------------------------------------------------------------------------------------------------------------------------------------------------------------------------------------------------------------------------------------------------------------------------------------------------------------------------------------------------------------------------------------------------------------------------------------------------------------------------------------------------------------------------------------------------------------------------------------------------------------------------------------------------------------------------------------------------------------------------------------------------------------------------------------------------------------------------------------------------------------------------------------------------------------------------------------------------------------------------------------------------------------------------------------------------------------------------------------------------------------------------------------------------------------------------------------------------------------------------------------------------------------------------------------------------------------------------------------------------------------------------------------------------------------------------------------------------------------------------------------------------------------------------------------------------------------------------------------------------------------------------------------------------------------------------------------------------------------------------------------------------------------------------------------------------------------------------------------------------------------------------------------------------------------------------------------------------------------------------------------------------------------------------------------------------------------------------------------------------------------------------------------------------------------------------------------------------------------------------------------------------------------------------------------------------------------------------------------------------------------------------------------------------------------------------------------------------------------------------------------------------------------------------------------------------------------------------------------------------------------------------------------------------------------------------------------------------------------------------------------------------------------------------------------------------------------------------------------------------------------------------------------------------------------------------------------------------------------------------------------------------------------------------------------------------------------------------------------------------------------------------------------------------------------------------------------------------------------------------------------------------------------------------------------------------------------------------------------------------------------------------------------------------------------------------------------------------------------------------------------------------------------------------------------------------------------------------------------------------------------------------------------------------------------------------------------------------------------------------------------------------------------------------------------------------------------------------------------------------------------------------------------------------------------------------------------------------------------------------------------------------------------------------------------------------------------------------------------------------------------------------------------------------------------------------------------------------------------------------------------------------------------------------------------------------------------------------------------------------------------------------------------------------------------------------------------------------------------------------------------------------------------------------------------------------------------------------------------------------------------------------------------------------------------------------------------------------------------------------------------------------------------------------------------------------------------------------------------------------------------------------------------------------------------------------------------------------------------------------------------------------------------------------------------------------------------------------------------------------------------------------------------------------------------------------------------------------------------------------------------------------------------------------------------------------------------------------------------------------------------------------------------------------------------------------------------------------------------------------------------------------------------------------------------------------------------------------------------------------------------------------------------------------------------------------------------------------------------------------------------------------------------------------------------------------------------------------------------------------------------------------------------------------------------------------------------------------------------------------------------------------------------------------------------------------------------------------------------------------------------------------------------------------------------------------------------------------------------------------------------------------------------------------------------------------------------------------------------------------------------------------------------------------------------------------------------------------------------------------------------------------------------------------------------------------------------------------------------------------------------------------------------------------------------------------------------------------------------------------------------------------------------------------------------------------------------------------------------------------------------------------------------------------------------------------------------------------------------------------------------------------------------------------------------------------------------------------------------------------------------------------------------------------------------------------------------------------------------------------------------------------------------------------------------------------------------------------------------------------------------------------------------------------------------------------------------------------------------------------------------------------------------------------------------------------------------------------------------------------------------------------------------------------------------------------------------------------------------------------------------------------------------------------------------------------------------------------------------------------------------------------------------------------------------------------------------------------------------------------------------------------------------------------------------------------------------------------------------------------------------------------------------------------------------------------------------------------------------------------------------------------------------------------------------------------------------------------------------------------------------------------------------------------------------------------------------------------------------------------------------------------------------------------------------------------------------------------------------------------------------------------------------------------------------------------------------------------------------------------------------------------------------------------------------------------------------------------------------------------------------------------------------------------------------------------------------------------------------------------------------------------------------------------------------------------------------------------------------------------------------------------------------------------------------------------------------------------------------------------------------------------------------------------------------------------------------------------------------------------------------------------------------------------------------------------------------------------------------------------------------------------------------------------------------------------------------------------------------------------------------------------------------------------------|
| GO MHC-I        | <p>                     ABCB9,ACE,AZGP1,B2M,BCAP31,CALR,CANX,CD207,CD36,CHUK,CLEC4A,CYBA,CYBB,ERAP1,ERAP2,FCER1G,FCGR1A,FCGR1B,HFE,HLA-A,HLA-B,HLA-C,HLA-E,HLA-F,HLA-G,HLA-H,IDE,IFI30,IKKBK,IKBKG,ITGAV,ITGB5,LNPEP,MFSD6,MR1,NCF1,NCF2,NCF4,PDIA3,PSMA1,PSMA2,PSMA3,PSMA4,PSMA5,PSMA6,PSMA7,PSMA8,PSMB1,PSMB10,PSMB11,PSMB2,PSMB3,PSMB4,PSMB5,PSMB6,PSMB7,PSMB8,PSMB9,PSMC1,PSMC2,PSMC3,PSMC4,PSMC5,PSMC6,PSMD1,PSMD10,PSMD11,PSMD12,PSMD13,PSMD14,PSMD2,PSMD3,PSMD4,PSMD5,PSMD6,PSMD7,PSMD8,PSMD9,PSME1,PSME2,PSME3,PSME4,PSMF1,SAR1B,SEC13,SEC22B,SEC23A,SEC24A,SEC24B,SEC24C,SEC24D,SEC31A,SNAP23,TAP1,TAP2,TAPBP,TAPBPL,VAMP3,VAMP8                 </p>                                                                                                                                                                                                                                                                                                                                                                                                                                                                                                                                                                                                                                                                                                                                                                                                                                                                                                                                                                                                                                                                                                                                                                                                                                                                                                                                                                                                                                                                                                                                                                                                                                                                                                                                                                                                                                                                                                                                                                                                                                                                                                                                                                                                                                                                                                                                                                                                                                                                                                                                                                                                                                                                                                                                                                                                                                                                                                                                                                                                                                                                                                                                                                                                                                                                                                                                                                                                                                                                                                                                                                                                                                                                                                                                                                                                                                                                                                                                                                                                                                                                                                                                                                                                                                                                                                                                                                                                                                                                                                                                                                                                                                                                                                                                                                                                                                                                                                                                                                                                                                                                                                                                                                                                                                                                                                                                                                                                                                                                                                                                                                                                                                                                                                                                                                                                                                                                                                                                                                                                                                                                                                                                                                                                                                                                                                                                                                                                                                                                                                                                                                                                                                                                                                                                                                                                                                                                                                                                                                                                                                                                                                                                                                                                                                                                                                                                                                                                                                                                                                                                                                                                                                                                                                                                                                                                                                                                                                                                                                                                                                                                                                                                                                                                                                                                                                                                                                                                                                                                                                                                                                                                                                                                                                                                                                                                                                                                                                                                                                                                                                                                                                                                                                                                                                                                                                                                                                                                                                                                                                                                                                                                                                                                                                                                                                                                                                                                                                                                                                                                                                                                                                                                                                                                                                                                                                                                                                                                             |
| GO MHC-II       | <p>                     ACTR10,ACTR1A,ACTR1B,AP1B1,AP1G1,AP1M1,AP1M2,AP1S1,AP1S2,AP1S3,AP2A1,AP2A2,AP2B1,AP2M1,AP2S1,ARF1,CANX,CAPZA1,CAPZA2,CAPZA3,CAPZB,CD74,CENPE,CLTA,CLTC,CTSD,CTSE,CTSF,CTSL,CTSS,CTSV,DCTN1,DCTN2,DCTN3,DCTN4,DCTN5,DCTN6,DNM2,DYNC1H1,DYNC1I1,DYNC1I2,DYNC1LI1,DYNC1LI2,DYNLL1,DYNLL2,FCER1G,FCGR2B,HLA-DMA,HLA-DMB,HLA-DOA,HLA-DOB,HLA-DPA1,HLA-DPB1,HLA-DQA1,HLA-DQA2,HLA-DQB1,HLA-DQB2,HLA-DRA,HLA-DRB1,HLA-DRB3,HLA-DRB4,HLA-DRB5,IFI30,KIF11,KIF15,KIF18A,KIF22,KIF23,KIF26A,KIF2A,KIF2B,KIF2C,KIF3A,KIF3B,KIF3C,KIF4A,KIF4B,KIF5A,KIFAP3,KLC1,KLC2,LAG3,LGMN,MARCF1,MARCF8,OSBPL1A,PIKFYVE,PYCARD,RAB7A,RACGAP1,RILP,SAR1B,SEC13,SEC23A,SEC24A,SEC24B,SEC24C,SEC24D,SEC31A,SH3GL2,SPTBN2,THBS1,TRAF6,TREM2                 </p>                                                                                                                                                                                                                                                                                                                                                                                                                                                                                                                                                                                                                                                                                                                                                                                                                                                                                                                                                                                                                                                                                                                                                                                                                                                                                                                                                                                                                                                                                                                                                                                                                                                                                                                                                                                                                                                                                                                                                                                                                                                                                                                                                                                                                                                                                                                                                                                                                                                                                                                                                                                                                                                                                                                                                                                                                                                                                                                                                                                                                                                                                                                                                                                                                                                                                                                                                                                                                                                                                                                                                                                                                                                                                                                                                                                                                                                                                                                                                                                                                                                                                                                                                                                                                                                                                                                                                                                                                                                                                                                                                                                                                                                                                                                                                                                                                                                                                                                                                                                                                                                                                                                                                                                                                                                                                                                                                                                                                                                                                                                                                                                                                                                                                                                                                                                                                                                                                                                                                                                                                                                                                                                                                                                                                                                                                                                                                                                                                                                                                                                                                                                                                                                                                                                                                                                                                                                                                                                                                                                                                                                                                                                                                                                                                                                                                                                                                                                                                                                                                                                                                                                                                                                                                                                                                                                                                                                                                                                                                                                                                                                                                                                                                                                                                                                                                                                                                                                                                                                                                                                                                                                                                                                                                                                                                                                                                                                                                                                                                                                                                                                                                                                                                                                                                                                                                                                                                                                                                                                                                                                                                                                                                                                                                                                                                                                                                                                                                                                                                                                                                                                                                                                                                                                                                                                                                                              |
| REATOMIE MHC-I  | <p>                     ANAPC1,ANAPC10,ANAPC11,ANAPC13,ANAPC2,ANAPC4,ANAPC5,ANAPC7,AREL1,ARIH2,ASB1,ASB10,ASB11,ASB12,ASB13,ASB14,ASB15,ASB16,ASB17,ASB18,ASB2,ASB3,ASB4,ASB5,ASB6,ASB7,ASB8,ASB9,ATG7,B2M,BCAP31,BLMH,BTBD1,BTBD6,BTK,BTRC,CALR,CANX,CBLB,CBL2,CCNF,CD14,CD207,CD36,CDC16,CDC20,CDC23,CDC26,CDC27,CDC34,CHUK,CTSL,CTSS,CTSV,CUL1,CUL2,CUL3,CUL5,CUL7,CYBA,CYBB,DCAF1,DET1,DTX3L,DZIP3,ELOB,ELOC,ERAP1,ERAP2,FBXL12,FBXL13,FBXL14,FBXL15,FBXL16,FBXL18,FBXL19,FBXL20,FBXL22,FBXL3,FBXL4,FBXL5,FBXL7,FBXL8,FBXO10,FBXO11,FBXO15,FBXO17,FBXO21,FBXO22,FBXO27,FBXO30,FBXO31,FBXO32,FBXO4,FBXO40,FBXO41,FBXO44,FBXO6,FBXO7,FBXO9,FBXW10,FBXW11,FBXW12,FBXW2,FBXW4,FBXW5,FBXW7,FBXW8,FBXW9,FCGR1A,FCGR1B,FGA,FGB,FGG,FZR1,GAN,GLMN,HACE1,HECTD1,HECTD2,HECTD3,HECW2,HERC1,HERC2,HERC3,HERC4,HERC5,HERC6,HLA-A,HLA-B,HLA-C,HLA-E,HLA-F,HLA-G,HMGB1,HSPA5,HUWE1,IKKBK,IKBKG,ITCH,ITGAV,ITGB5,KBTBD13,KBTBD6,KBTBD7,KBTBD8,KCTD6,KCTD7,KEAP1,KLHL11,KLHL13,KLHL2,KLHL20,KLHL21,KLHL22,KLHL25,KLHL3,KLHL4,KLHL42,KLHL5,KLHL9,LMO7,LNPEP,LNX1,LONRF1,LRR1,LRRC41,LRSAM1,LTN1,LY96,MEX3C,MGRN1,MIB2,MKRN1,MRC1,MRC2,MYD88,MYLIP,NCF1,NCF2,NCF4,NEDD4,NEDD4L,NPEPPS,PDIA3,PJA1,PJA2,PRKN,PSMA1,PSMA2,PSMA3,PSMA4,PSMA5,PSMA6,PSMA7,PSMA8,PSMB1,PSMB10,PSMB11,PSMB2,PSMB3,PSMB4,PSMB5,PSMB6,PSMB7,PSMB8,PSMB9,PSMC1,PSMC2,PSMC3,PSMC4,PSMC5,PSMC6,PSMD1,PSMD10,PSMD11,PSMD12,PSMD13,PSMD14,PSMD2,PSMD3,PSMD4,PSMD5,PSMD6,PSMD7,PSMD8,PSMD9,PSME1,PSME2,PSME3,PSME4,PSMF1,RBBP6,RBCK1,RBX1,RCHY1,RLIM,RNF111,RNF114,RNF115,RNF123,RNF126,RNF130,RNF138,RNF14,RNF144B,RNF182,RNF19A,RNF19B,RNF213,RNF217,RNF220,RNF25,RNF34,RNF4,RNF41,RNF6,RNF7,RPS27A,S100A1,S100A8,S100A9,SAR1B,SEC13,SEC22B,SEC23A,SEC24A,SEC24B,SEC24C,SEC24D,SEC31A,SEC61A1,SEC61A2,SEC61B,SEC61G,SEM1,SH3RF1,SH3RF2,SH3RF3,SH3RF4,SH3RF5,SH3RF6,SH3RF7,SH3RF8,SH3RF9,SH3RF10,SH3RF11,SH3RF12,SH3RF13,SH3RF14,SH3RF15,SH3RF16,SH3RF17,SH3RF18,SH3RF19,SH3RF20,SH3RF21,SH3RF22,SH3RF23,SH3RF24,SH3RF25,SH3RF26,SH3RF27,SH3RF28,SH3RF29,SH3RF30,SH3RF31,SH3RF32,SH3RF33,SH3RF34,SH3RF35,SH3RF36,SH3RF37,SH3RF38,SH3RF39,SH3RF40,SH3RF41,SH3RF42,SH3RF43,SH3RF44,SH3RF45,SH3RF46,SH3RF47,SH3RF48,SH3RF49,SH3RF50,SH3RF51,SH3RF52,SH3RF53,SH3RF54,SH3RF55,SH3RF56,SH3RF57,SH3RF58,SH3RF59,SH3RF60,SH3RF61,SH3RF62,SH3RF63,SH3RF64,SH3RF65,SH3RF66,SH3RF67,SH3RF68,SH3RF69,SH3RF70,SH3RF71,SH3RF72,SH3RF73,SH3RF74,SH3RF75,SH3RF76,SH3RF77,SH3RF78,SH3RF79,SH3RF80,SH3RF81,SH3RF82,SH3RF83,SH3RF84,SH3RF85,SH3RF86,SH3RF87,SH3RF88,SH3RF89,SH3RF90,SH3RF91,SH3RF92,SH3RF93,SH3RF94,SH3RF95,SH3RF96,SH3RF97,SH3RF98,SH3RF99,SH3RF100,SH3RF101,SH3RF102,SH3RF103,SH3RF104,SH3RF105,SH3RF106,SH3RF107,SH3RF108,SH3RF109,SH3RF110,SH3RF111,SH3RF112,SH3RF113,SH3RF114,SH3RF115,SH3RF116,SH3RF117,SH3RF118,SH3RF119,SH3RF120,SH3RF121,SH3RF122,SH3RF123,SH3RF124,SH3RF125,SH3RF126,SH3RF127,SH3RF128,SH3RF129,SH3RF130,SH3RF131,SH3RF132,SH3RF133,SH3RF134,SH3RF135,SH3RF136,SH3RF137,SH3RF138,SH3RF139,SH3RF140,SH3RF141,SH3RF142,SH3RF143,SH3RF144,SH3RF145,SH3RF146,SH3RF147,SH3RF148,SH3RF149,SH3RF150,SH3RF151,SH3RF152,SH3RF153,SH3RF154,SH3RF155,SH3RF156,SH3RF157,SH3RF158,SH3RF159,SH3RF160,SH3RF161,SH3RF162,SH3RF163,SH3RF164,SH3RF165,SH3RF166,SH3RF167,SH3RF168,SH3RF169,SH3RF170,SH3RF171,SH3RF172,SH3RF173,SH3RF174,SH3RF175,SH3RF176,SH3RF177,SH3RF178,SH3RF179,SH3RF180,SH3RF181,SH3RF182,SH3RF183,SH3RF184,SH3RF185,SH3RF186,SH3RF187,SH3RF188,SH3RF189,SH3RF190,SH3RF191,SH3RF192,SH3RF193,SH3RF194,SH3RF195,SH3RF196,SH3RF197,SH3RF198,SH3RF199,SH3RF200,SH3RF201,SH3RF202,SH3RF203,SH3RF204,SH3RF205,SH3RF206,SH3RF207,SH3RF208,SH3RF209,SH3RF210,SH3RF211,SH3RF212,SH3RF213,SH3RF214,SH3RF215,SH3RF216,SH3RF217,SH3RF218,SH3RF219,SH3RF220,SH3RF221,SH3RF222,SH3RF223,SH3RF224,SH3RF225,SH3RF226,SH3RF227,SH3RF228,SH3RF229,SH3RF230,SH3RF231,SH3RF232,SH3RF233,SH3RF234,SH3RF235,SH3RF236,SH3RF237,SH3RF238,SH3RF239,SH3RF240,SH3RF241,SH3RF242,SH3RF243,SH3RF244,SH3RF245,SH3RF246,SH3RF247,SH3RF248,SH3RF249,SH3RF250,SH3RF251,SH3RF252,SH3RF253,SH3RF254,SH3RF255,SH3RF256,SH3RF257,SH3RF258,SH3RF259,SH3RF260,SH3RF261,SH3RF262,SH3RF263,SH3RF264,SH3RF265,SH3RF266,SH3RF267,SH3RF268,SH3RF269,SH3RF270,SH3RF271,SH3RF272,SH3RF273,SH3RF274,SH3RF275,SH3RF276,SH3RF277,SH3RF278,SH3RF279,SH3RF280,SH3RF281,SH3RF282,SH3RF283,SH3RF284,SH3RF285,SH3RF286,SH3RF287,SH3RF288,SH3RF289,SH3RF290,SH3RF291,SH3RF292,SH3RF293,SH3RF294,SH3RF295,SH3RF296,SH3RF297,SH3RF298,SH3RF299,SH3RF300,SH3RF301,SH3RF302,SH3RF303,SH3RF304,SH3RF305,SH3RF306,SH3RF307,SH3RF308,SH3RF309,SH3RF310,SH3RF311,SH3RF312,SH3RF313,SH3RF314,SH3RF315,SH3RF316,SH3RF317,SH3RF318,SH3RF319,SH3RF320,SH3RF321,SH3RF322,SH3RF323,SH3RF324,SH3RF325,SH3RF326,SH3RF327,SH3RF328,SH3RF329,SH3RF330,SH3RF331,SH3RF332,SH3RF333,SH3RF334,SH3RF335,SH3RF336,SH3RF337,SH3RF338,SH3RF339,SH3RF340,SH3RF341,SH3RF342,SH3RF343,SH3RF344,SH3RF345,SH3RF346,SH3RF347,SH3RF348,SH3RF349,SH3RF350,SH3RF351,SH3RF352,SH3RF353,SH3RF354,SH3RF355,SH3RF356,SH3RF357,SH3RF358,SH3RF359,SH3RF360,SH3RF361,SH3RF362,SH3RF363,SH3RF364,SH3RF365,SH3RF366,SH3RF367,SH3RF368,SH3RF369,SH3RF370,SH3RF371,SH3RF372,SH3RF373,SH3RF374,SH3RF375,SH3RF376,SH3RF377,SH3RF378,SH3RF379,SH3RF380,SH3RF381,SH3RF382,SH3RF383,SH3RF384,SH3RF385,SH3RF386,SH3RF387,SH3RF388,SH3RF389,SH3RF390,SH3RF391,SH3RF392,SH3RF393,SH3RF394,SH3RF395,SH3RF396,SH3RF397,SH3RF398,SH3RF399,SH3RF400,SH3RF401,SH3RF402,SH3RF403,SH3RF404,SH3RF405,SH3RF406,SH3RF407,SH3RF408,SH3RF409,SH3RF410,SH3RF411,SH3RF412,SH3RF413,SH3RF414,SH3RF415,SH3RF416,SH3RF417,SH3RF418,SH3RF419,SH3RF420,SH3RF421,SH3RF422,SH3RF423,SH3RF424,SH3RF425,SH3RF426,SH3RF427,SH3RF428,SH3RF429,SH3RF430,SH3RF431,SH3RF432,SH3RF433,SH3RF434,SH3RF435,SH3RF436,SH3RF437,SH3RF438,SH3RF439,SH3RF440,SH3RF441,SH3RF442,SH3RF443,SH3RF444,SH3RF445,SH3RF446,SH3RF447,SH3RF448,SH3RF449,SH3RF450,SH3RF451,SH3RF452,SH3RF453,SH3RF454,SH3RF455,SH3RF456,SH3RF457,SH3RF458,SH3RF459,SH3RF460,SH3RF461,SH3RF462,SH3RF463,SH3RF464,SH3RF465,SH3RF466,SH3RF467,SH3RF468,SH3RF469,SH3RF470,SH3RF471,SH3RF472,SH3RF473,SH3RF474,SH3RF475,SH3RF476,SH3RF477,SH3RF478,SH3RF479,SH3RF480,SH3RF481,SH3RF482,SH3RF483,SH3RF484,SH3RF485,SH3RF486,SH3RF487,SH3RF488,SH3RF489,SH3RF490,SH3RF491,SH3RF492,SH3RF493,SH3RF494,SH3RF495,SH3RF496,SH3RF497,SH3RF498,SH3RF499,SH3RF500,SH3RF501,SH3RF502,SH3RF503,SH3RF504,SH3RF505,SH3RF506,SH3RF507,SH3RF508,SH3RF509,SH3RF510,SH3RF511,SH3RF512,SH3RF513,SH3RF514,SH3RF515,SH3RF516,SH3RF517,SH3RF518,SH3RF519,SH3RF520,SH3RF521,SH3RF522,SH3RF523,SH3RF524,SH3RF525,SH3RF526,SH3RF527,SH3RF528,SH3RF529,SH3RF530,SH3RF531,SH3RF532,SH3RF533,SH3RF534,SH3RF535,SH3RF536,SH3RF537,SH3RF538,SH3RF539,SH3RF540,SH3RF541,SH3RF542,SH3RF543,SH3RF544,SH3RF545,SH3RF546,SH3RF547,SH3RF548,SH3RF549,SH3RF550,SH3RF551,SH3RF552,SH3RF553,SH3RF554,SH3RF555,SH3RF556,SH3RF557,SH3RF558,SH3RF559,SH3RF560,SH3RF561,SH3RF562,SH3RF563,SH3RF564,SH3RF565,SH3RF566,SH3RF567,SH3RF568,SH3RF569,SH3RF570,SH3RF571,SH3RF572,SH3RF573,SH3RF574,SH3RF575,SH3RF576,SH3RF577,SH3RF578,SH3RF579,SH3RF580,SH3RF581,SH3RF582,SH3RF583,SH3RF584,SH3RF585,SH3RF586,SH3RF587,SH3RF588,SH3RF589,SH3RF590,SH3RF591,SH3RF592,SH3RF593,SH3RF594,SH3RF595,SH3RF596,SH3RF597,SH3RF598,SH3RF599,SH3RF600,SH3RF601,SH3RF602,SH3RF603,SH3RF604,SH3RF605,SH3RF606,SH3RF607,SH3RF608,SH3RF609,SH3RF610,SH3RF611,SH3RF612,SH3RF613,SH3RF614,SH3RF615,SH3RF616,SH3RF617,SH3RF618,SH3RF619,SH3RF620,SH3RF621,SH3RF622,SH3RF623,SH3RF624,SH3RF625,SH3RF626,SH3RF627,SH3RF628,SH3RF629,SH3RF630,SH3RF631,SH3RF632,SH3RF633,SH3RF634,SH3RF635,SH3RF636,SH3RF637,SH3RF638,SH3RF639,SH3RF640,SH3RF641,SH3RF642,SH3RF643,SH3RF644,SH3RF645,SH3RF646,SH3RF647,SH3RF648,SH3RF649,SH3RF650,SH3RF651,SH3RF652,SH3RF653,SH3RF654,SH3RF655,SH3RF656,SH3RF657,SH3RF658,SH3RF659,SH3RF660,SH3RF661,SH3RF662,SH3RF663,SH3RF664,SH3RF665,SH3RF666,SH3RF667,SH3RF668,SH3RF669,SH3RF670,SH3RF671,SH3RF672,SH3RF673,SH3RF674,SH3RF675,SH3RF676,SH3RF677,SH3RF678,SH3RF679,SH3RF680,SH3RF681,SH3RF682,SH3RF683,SH3RF684,SH3RF685,SH3RF686,SH3RF687,SH3RF688,SH3RF689,SH3RF690,SH3RF691,SH3RF692,SH3RF693,SH3RF694,SH3RF695,SH3RF696,SH3RF697,SH3RF698,SH3RF699,SH3RF700,SH3RF701,SH3RF702,SH3RF703,SH3RF704,SH3RF705,SH3RF706,SH3RF707,SH3RF708,SH3RF709,SH3RF710,SH3RF711,SH3RF712,SH3RF713,SH3RF714,SH3RF715,SH3RF716,SH3RF717,SH3RF718,SH3RF719,SH3RF720,SH3RF721,SH3RF722,SH3RF723,SH3RF724,SH3RF725,SH3RF726,SH3RF727,SH3RF728,SH3RF729,SH3RF730,SH3RF731,SH3RF732,SH3RF733,SH3RF734,SH3RF735,SH3RF736,SH3RF737,SH3RF738,SH3RF739,SH3RF740,SH3RF741,SH3RF742,SH3RF743,SH3RF744,SH3RF745,SH3RF746,SH3RF747,SH3RF748,SH3RF749,SH3RF750,SH3RF751,SH3RF752,SH3RF753,SH3RF754,SH3RF755,SH3RF756,SH3RF757,SH3RF758,SH3RF759,SH3RF760,SH3RF761,SH3RF762,SH3RF763,SH3RF764,SH3RF765,SH3RF766,SH3RF767,SH3RF768,SH3RF769,SH3RF770,SH3RF771,SH3RF772,SH3RF773,SH3RF774,SH3RF775,SH3RF776,SH3RF777,SH3RF778,SH3RF779,SH3RF780,SH3RF781,SH3RF782,SH3RF783,SH3RF784,SH3RF785,SH3RF786,SH3RF787,SH3RF788,SH3RF789,SH3RF790,SH3RF791,SH3RF792,SH3RF793,SH3RF794,SH3RF795,SH3RF796,SH3RF797,SH3RF798,SH3RF799,SH3RF800,SH3RF801,SH3RF802,SH3RF803,SH3RF804,SH3RF805,SH3RF806,SH3RF807,SH3RF808,SH3RF809,SH3RF810,SH3RF811,SH3RF812,SH3RF813,SH3RF814,SH3RF815,SH3RF816,SH3RF817,SH3RF818,SH3RF819,SH3RF820,SH3RF821,SH3RF822,SH3RF823,SH3RF824,SH3RF825,SH3RF826,SH3RF827,SH3RF828,SH3RF829,SH3RF830,SH3RF831,SH3RF832,SH3RF833,SH3RF834,SH3RF835,SH3RF836,SH3RF837,SH3RF838,SH3RF839,SH3RF840,SH3RF841,SH3RF842,SH3RF843,SH3RF844,SH3RF845,SH3RF846,SH3RF847,SH3RF848,SH3RF849,SH3RF850,SH3RF851,SH3RF852,SH3RF853,SH3RF854,SH3RF855,SH3RF856,SH3RF857,SH3RF858,SH3RF859,SH3RF860,SH3RF861,SH3RF862,SH3RF863,SH3RF864,SH3RF865,SH3RF866,SH3RF867,SH3RF868,SH3RF869,SH3RF870,SH3RF871,SH3RF872,SH3RF873,SH3RF874,SH3RF875,SH3RF876,SH3RF877,SH3RF878,SH3RF879,SH3RF880,SH3RF881,SH3RF882,SH3RF883,SH3RF884,SH3RF885,SH3RF886,SH3RF887,SH3RF888,SH3RF889,SH3RF890,SH3RF891,SH3RF892,SH3RF893,SH3RF894,SH3RF895,SH3RF896,SH3RF897,SH3RF898,SH3RF899,SH3RF900,SH3RF901,SH3RF902,SH3RF903,SH3RF904,SH3RF905,SH3RF906,SH3RF907,SH3RF908,SH3RF909,SH3RF910,SH3RF911,SH3RF912,SH3RF913,SH3RF914,SH3RF915,SH3RF916,SH3RF917,SH3RF918,SH3RF919,SH3RF920,SH3RF921,SH3RF922,SH3RF923,SH3RF924,SH3RF925,SH3RF926,SH3RF927,SH3RF928,SH3RF929,SH3RF930,SH3RF931,SH3RF932,SH3RF933,SH3RF934,SH3RF935,SH3RF936,SH3RF937,SH3RF938,SH3RF939,SH3RF940,SH3RF941,SH3RF942,SH3RF943,SH3RF944,SH3RF945,SH3RF946,SH3RF947,SH3RF948,SH3RF949,SH3RF950,SH3RF951,SH3RF952,SH3RF953,SH3RF954,SH3RF955,SH3RF956,SH3RF957,SH3RF958,SH3RF959,SH3RF960,SH3RF961,SH3RF962,SH3RF963,SH3RF964,SH3RF965,SH3RF966,SH3RF967,SH3RF968,SH3RF969,SH3RF970,SH3RF971,SH3RF972,SH3RF973,SH3RF974,SH3RF975,SH3RF976,SH3RF977,SH3RF978,SH3RF979,SH3RF980,SH3RF981,SH3RF982,SH3RF983,SH3RF984,SH3RF985,SH3RF986,SH3RF987,SH3RF988,SH3RF989,SH3RF990,SH3RF991,SH3RF992,SH3RF993,SH3RF994,SH3RF995,SH3RF996,SH3RF997,SH3RF998,SH3RF999,SH3RF1000,ZNR1,ZNRF2                 </p> |
| REATOMIE MHC-II | <p>                     ACTR10,ACTR1A,ACTR1B,AP1B1,AP1G1,AP1M1,AP1M2,AP1S1,AP1S2,AP1S3,AP2A1,AP2A2,AP2B1,AP2M1,AP2S1,ARF1,CANX,CAPZA1,CAPZA2,CAPZA3,CAPZB,CD74,CENPE,CLTA,CLTC,CTSA,CTSB,CTSC,CTSD,CTSE,CTSF,CTSH,CTSK,CTSL,CTSO,CTSS,CTSV,DCTN1,DCTN2,DCTN3,DCTN4,DCTN5,DCTN6,DNM1,DNM2,DNM3,DYNC1H1,DYNC1I1,DYNC1I2,DYNC1LI1,DYNC1LI2,DYNLL1,DYNLL2,HLA-DMA,HLA-DMB,HLA-DOA,HLA-DOB,HLA-DPA1,HLA-DPB1,HLA-DQA1,HLA-DQA2,HLA-DQB1,HLA-DQB2,HLA-DRA,HLA-DRB1,HLA-DRB3,HLA-DRB4,HLA-DRB5,IFI30,KIF11,KIF15,KIF18A,KIF20A,KIF22,KIF23,KIF26A,KIF2A,KIF2B,KIF2C,KIF3A,KIF3B,KIF3C,KIF4A,KIF4B,KIF5A,KIF5B,KIFAP3,KLC1,KLC2,KLC3,KLC4,LAG3,LGMN,OSBPL1A,RAB7A,RACGAP1,RILP,SAR1B,SEC13,SEC23A,SEC24A,SEC24B,SEC24C,SEC24D,SEC31A,SH3GL2,SPTBN2,TUBA1A,TUBA1B,TUBA1C,TUBA3C,TUBA3D,TUBA3E,TUBA4A,TUBA4B,TUBA8,TUBAL3,TUBB1,TUBB2A,TUBB2B,TUBB3,TUBB4A,TUBB4B,TUBB6,TUBB8,TUBB8B                 </p>                                                                                                                                                                                                                                                                                                                                                                                                                                                                                                                                                                                                                                                                                                                                                                                                                                                                                                                                                                                                                                                                                                                                                                                                                                                                                                                                                                                                                                                                                                                                                                                                                                                                                                                                                                                                                                                                                                                                                                                                                                                                                                                                                                                                                                                                                                                                                                                                                                                                                                                                                                                                                                                                                                                                                                                                                                                                                                                                                                                                                                                                                                                                                                                                                                                                                                                                                                                                                                                                                                                                                                                                                                                                                                                                                                                                                                                                                                                                                                                                                                                                                                                                                                                                                                                                                                                                                                                                                                                                                                                                                                                                                                                                                                                                                                                                                                                                                                                                                                                                                                                                                                                                                                                                                                                                                                                                                                                                                                                                                                                                                                                                                                                                                                                                                                                                                                                                                                                                                                                                                                                                                                                                                                                                                                                                                                                                                                                                                                                                                                                                                                                                                                                                                                                                                                                                                                                                                                                                                                                                                                                                                                                                                                                                                                                                                                                                                                                                                                                                                                                                                                                                                                                                                                                                                                                                                                                                                                                                                                                                                                                                                                                                                                                                                                                                                                                                                                                                                                                                                                                                                                                                                                                                                                                                                                                                                                                                                                                                                                                                                                                                                                                                                                                                                                                                                                                                                                                                                                                                                                                                                                                                                                                                                                                                                                                                                                                                                                                                                                                                                                                                                                                                                                            |

**Supplementary Table 3: Number of sample information**

|                                                                    | <b>cancer type</b> | <b>ecDNA positive</b> | <b>ecDNA negative</b> |
|--------------------------------------------------------------------|--------------------|-----------------------|-----------------------|
| Number of TCGA samples with WGS data available for ecDNA detection | BLCA               | 33                    | 79                    |
|                                                                    | BRCA               | 29                    | 79                    |
|                                                                    | CESC               | 15                    | 51                    |
|                                                                    | COAD               | 4                     | 52                    |
|                                                                    | DLBC               | 1                     | 6                     |
|                                                                    | ESCA               | 29                    | 31                    |
|                                                                    | GBM                | 28                    | 19                    |
|                                                                    | HNSC               | 39                    | 114                   |
|                                                                    | KICH               | 1                     | 49                    |
|                                                                    | KIRC               | 1                     | 43                    |
|                                                                    | KIRP               | 2                     | 34                    |
|                                                                    | LAML               | 0                     | 40                    |
|                                                                    | LGG                | 11                    | 74                    |
|                                                                    | LIHC               | 4                     | 48                    |
|                                                                    | LUAD               | 22                    | 121                   |
|                                                                    | LUSC               | 14                    | 36                    |
|                                                                    | OV                 | 11                    | 34                    |
|                                                                    | PRAD               | 2                     | 119                   |
|                                                                    | READ               | 0                     | 18                    |
|                                                                    | SARC               | 17                    | 19                    |
|                                                                    | SKCM               | 23                    | 113                   |
|                                                                    | STAD               | 32                    | 95                    |
| THCA                                                               | 0                  | 136                   |                       |
| UCEC                                                               | 20                 | 123                   |                       |
| UVM                                                                | 1                  | 49                    |                       |
| Number of TCGA samples with gene expression data available         | BLCA               | 33                    | 79                    |
|                                                                    | BRCA               | 29                    | 79                    |
|                                                                    | CESC               | 15                    | 50                    |
|                                                                    | COAD               | 4                     | 29                    |
|                                                                    | DLBC               | 1                     | 6                     |
|                                                                    | ESCA               | 28                    | 30                    |
|                                                                    | GBM                | 18                    | 11                    |
|                                                                    |                    |                       |                       |

|  | <b>cancer type</b> | <b>ecDNA positive</b> | <b>ecDNA negative</b> |
|--|--------------------|-----------------------|-----------------------|
|  | HNSC               | 39                    | 113                   |
|  | KICH               | 1                     | 49                    |
|  | KIRC               | 1                     | 43                    |
|  | KIRP               | 2                     | 34                    |
|  | LAML               | 0                     | 31                    |
|  | LGG                | 11                    | 72                    |
|  | LIHC               | 4                     | 46                    |
|  | LUAD               | 22                    | 119                   |
|  | LUSC               | 14                    | 36                    |
|  | OV                 | 10                    | 25                    |
|  | PRAD               | 2                     | 119                   |
|  | READ               | 0                     | 2                     |
|  | SARC               | 17                    | 19                    |
|  | SKCM               | 23                    | 113                   |
|  | STAD               | 27                    | 87                    |
|  | THCA               | 0                     | 133                   |
|  | UCEC               | 1                     | 8                     |
|  | UVM                | 1                     | 48                    |

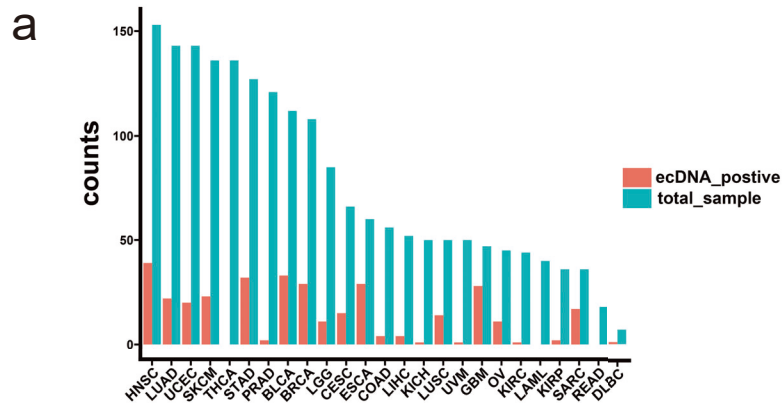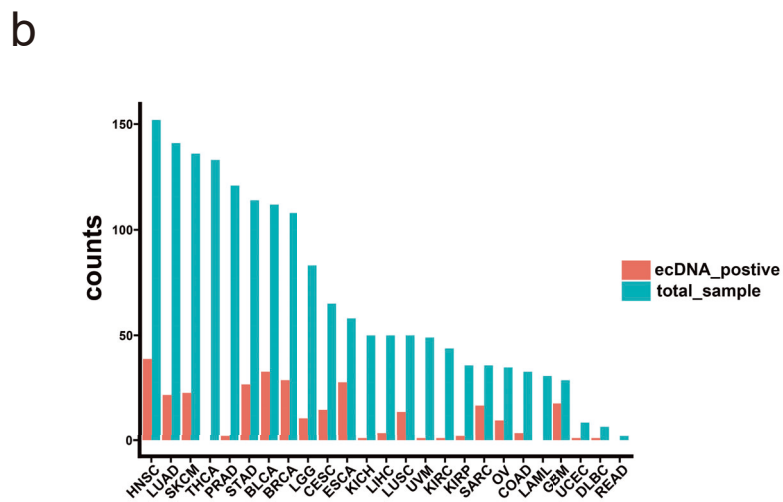

**Supplementary Fig. S1 Sample counts distribution of the cancer types with WGS and gene expression data available for ecDNA analysis. a.** Total number of cancer samples with ecDNA status information. **b.** Number of cancer samples with both ecDNA status and gene expression information. TCGA cancer type acronyms: THYM (thymoma), ESCA (esophageal carcinoma), BRCA (breast invasive carcinoma), LUAD (lung adenocarcinoma), LUSC (lung squamous cell carcinoma), KICH (kidney chromophobe), STAD (stomach adenocarcinoma), CHOL (cholangiocarcinoma), LIHC (liver hepatocellular carcinoma), PRAD (prostate adenocarcinoma), HNSC (head and neck squamous cell carcinoma), KIRP (kidney renal papillary cell carcinoma), SARC (sarcoma), UCEC (uterine corpus endometrial carcinoma), BLCA (bladder urothelial carcinoma), PAAD (pancreatic adenocarcinoma), CESC (cervical squamous cell carcinoma and endocervical adenocarcinoma), GBM (glioblastoma multiforme), KIRC (kidney renal clear cell carcinoma), SKCM (skin cutaneous melanoma), PCPG (pheochromocytoma and paraganglioma), THCA (thyroid carcinoma), LGG (Brain Lower Grade Glioma), UVM (Uveal Melanoma), OV (Ovarian serous cystadenocarcinoma), COAD (Colon adenocarcinoma), LAML (Acute Myeloid Leukemia), DLBC (Lymphoid Neoplasm Diffuse Large B-cell Lymphoma), READ (Rectum adenocarcinoma).

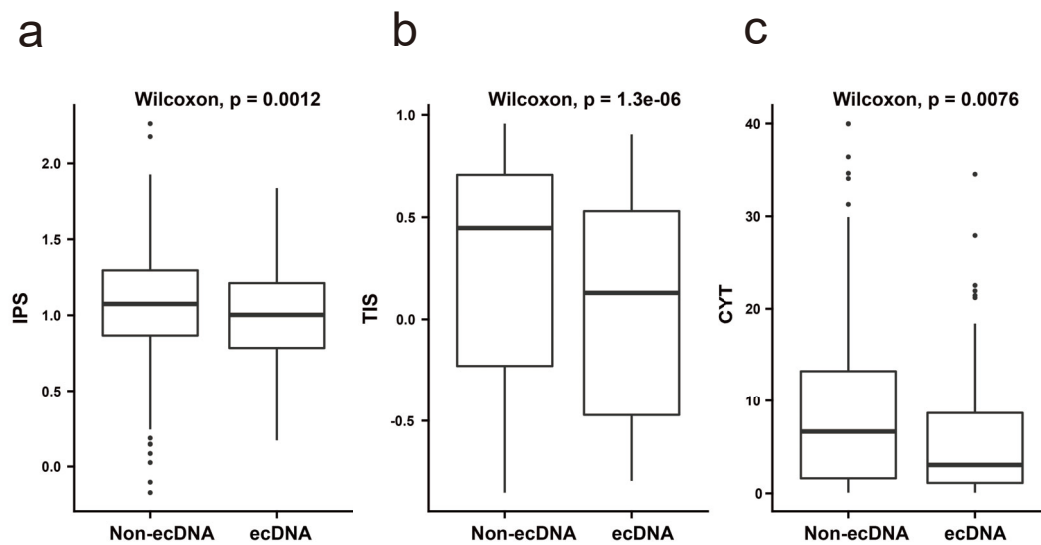

**Supplementary Fig. S2 Comparisons of immune infiltration scores calculated by different methods between ecDNA and non-ecDNA samples. a.** Immunophenoscore (IPS) was used to measure the immune state of the samples, and was calculated according to Charoentong et al 2017 study. **b.** Tumor inflammation signature (TIS) score was calculated by GSVA using the gene signature described in Danaher et al 2018 study. **c.** Cytolytic activity score (CYT) was calculated as the geometric mean of expression of GZMA and PRF1 genes. Wilcoxon test *P* values are shown.



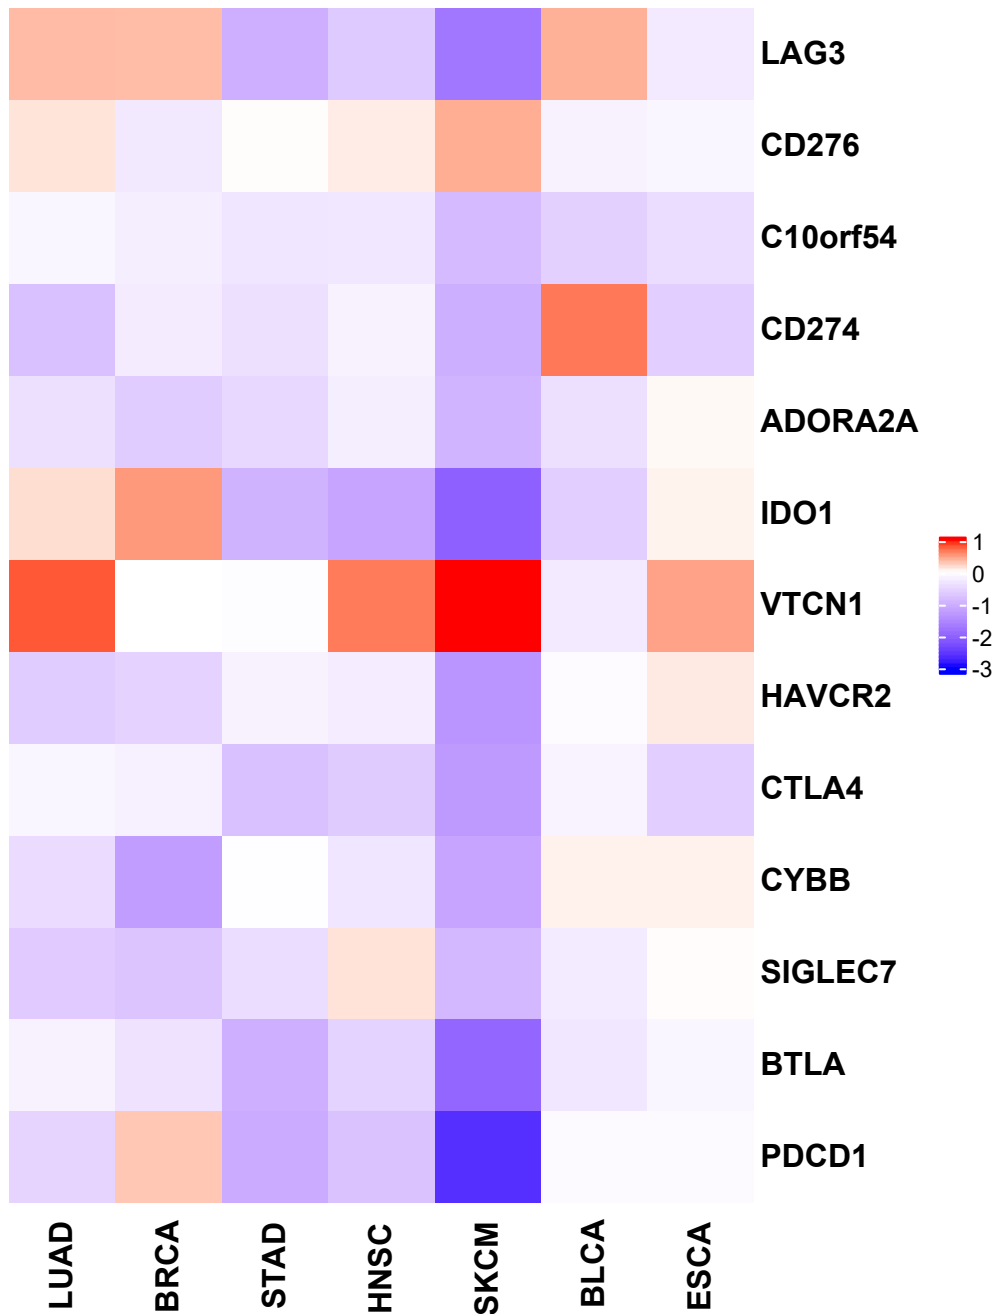

**Supplementary Fig. S4 Pan-cancer comparisons of the expression of inhibitory immune checkpoint genes between tumors with and without ecDNA.** Heatmap color indicates the difference between the median expression for specific gene in specific cancer type between ecDNA and non-ecDNA samples. Median mRNA expression (in TPM format) of specific gene (row) in samples with ecDNA minus median expression of this gene in samples without ecDNA in a cancer type (column) is reported. TCGA cancer type acronyms: ESCA (esophageal carcinoma), BRCA (breast invasive carcinoma), LUAD (lung adenocarcinoma), STAD (stomach adenocarcinoma), HNSC (head and neck squamous cell carcinoma), BLCA (bladder urothelial carcinoma), SKCM (skin cutaneous melanoma).



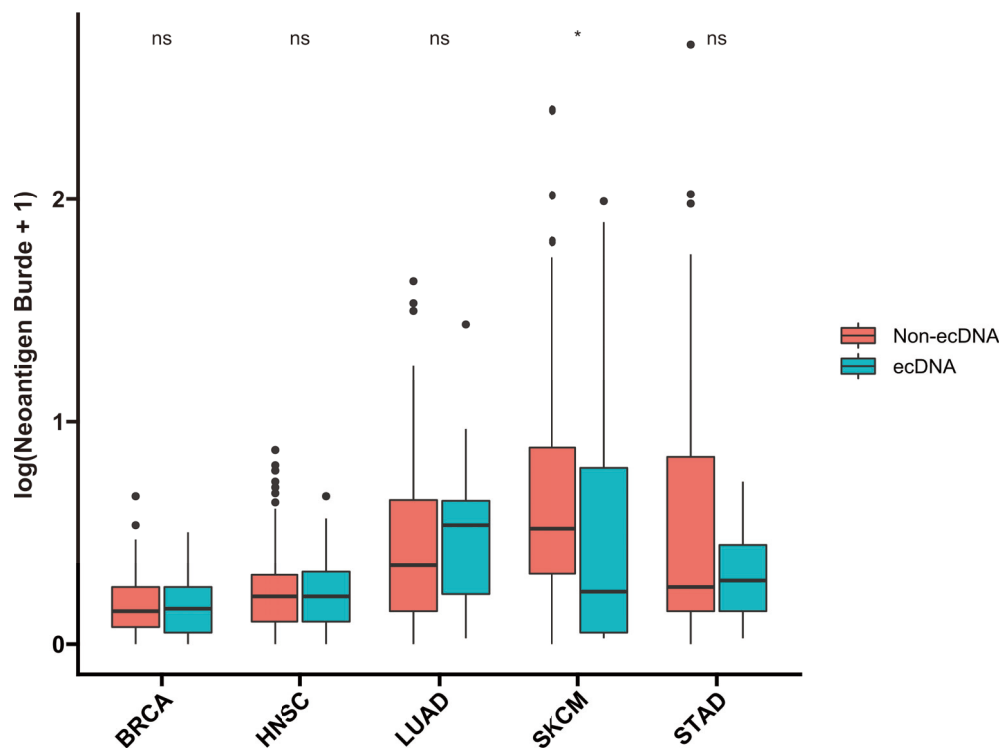

**Supplementary Fig. S5 Pan-cancer comparisons of tumor neoantigen burden in tumors with and without ecDNA.** Wilcoxon test  $P$  values are shown. ns:  $P > 0.05$ , \*:  $P \leq 0.05$ . TCGA cancer type acronyms: BRCA (breast invasive carcinoma), LUAD (lung adenocarcinoma), STAD (stomach adenocarcinoma), HNSC (head and neck squamous cell carcinoma), SKCM (skin cutaneous melanoma).

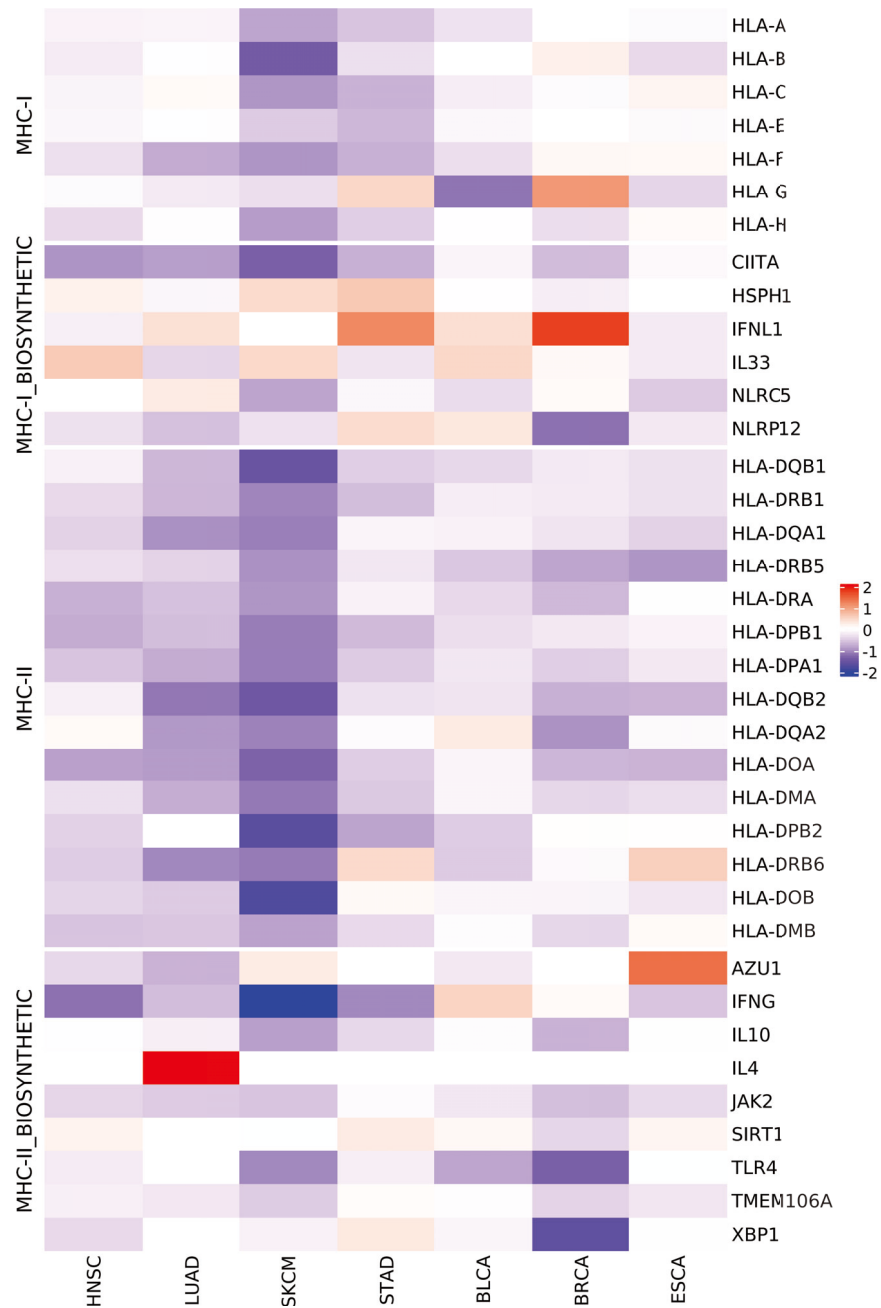

**Supplementary Fig. S6 Pan-cancer comparisons of the expression of MHC class I and class II antigen presentation genes in tumor with and without ecDNA.** Heatmap color indicates the difference between the median expression for specific gene in specific cancer type between ecDNA and non-ecDNA samples. Median mRNA expression (in TPM format) of specific gene (row) in samples with ecDNA minus median expression of this gene in samples without ecDNA in a cancer type (column) is reported. TCGA cancer type acronyms: ESCA (esophageal carcinoma), BRCA (breast invasive carcinoma), LUAD (lung adenocarcinoma), STAD (stomach adenocarcinoma), HNSC (head and neck squamous cell carcinoma), BLCA (bladder urothelial carcinoma), SKCM (skin cutaneous melanoma).

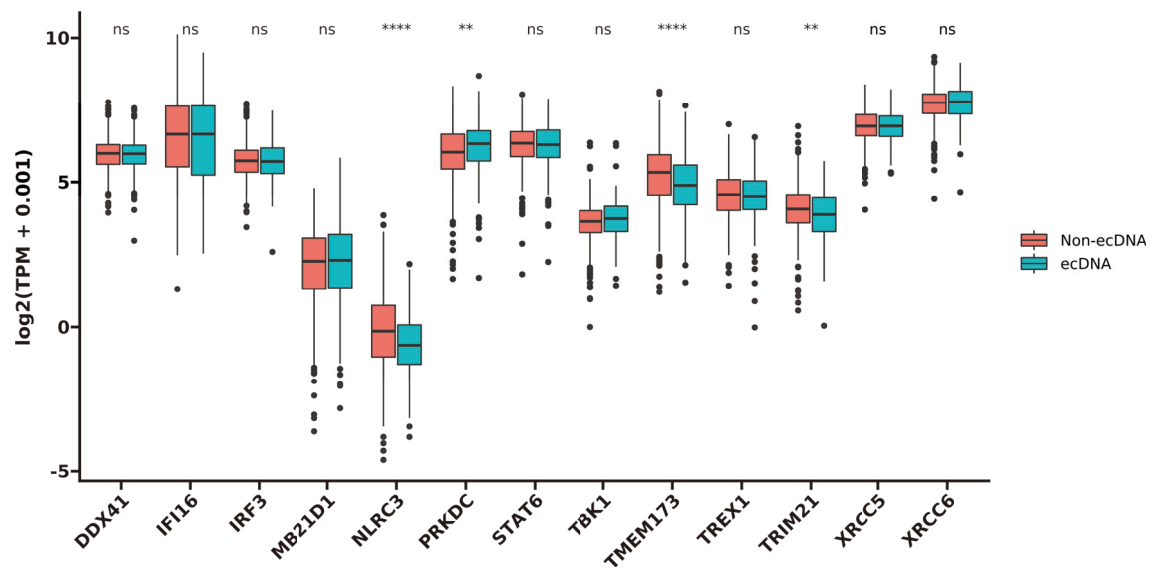

**Supplementary Fig. S7 Comparisons of the expression of cGAS-STING pathway genes between tumors with and without ecDNA.** Wilcoxon test *P* values are shown. ns:  $P > 0.05$ , \*:  $P \leq 0.05$ , \*\*:  $P \leq 0.01$ , \*\*\*:  $P \leq 0.001$ , \*\*\*\*:  $P \leq 0.0001$ .
